# Supplementary material
Source: publisher site journal article supplement (https://www.dovepress.com/article/335680)
Supplement: Supplementary file 1 [file get_supplementary_file.php]

**Table S1. The characteristics of clinical samples**

| **Characteristic** | **Normal** | **Asthma** |
| --- | --- | --- |
| Male/Female numbers | 32/6 | 33/5 |
| Age, year | 11.2±2.5 | 9.7±3.8 |
| Asthma duration, month | N/A | 6.58 ± 6.9 |
| Blood eosinophil | Not done | 353.9 ± 212.08 |
| Total IgE (ku/L) | Not done | 159.2 ± 111.6 |
| Asthma control questionnaire | Not done | 0.97 ± 0.8 |

**Table S2. Primer list**

|  | forward primers | reverse primers |
| --- | --- | --- |
| U6 | 5'-CTCGCTTGGGCAGCACA-3' | 5'-AACGCTTCACGAATTTGCGT-3' |
| miR-301a-3p | 5'-ACACTCCAGCTGGGCAGTGCAATAGTATTGT-3' | 5'-CTCAACTGGTGTCGTGGA-3' |
| STAT3 | 5′‐CAGCAGCTTGACACACGGTA‐3′ | 5′‐AAACACCAAAGTGGCATGTGA-3’ |
| β‐actin | 5′‐CCGTTGCCCTGAGGCTCTTT‐3′ | 5′‐CCTT CTGCATCCTGTCAGCAA‐3′ |
